# Supplementary material for: Two New Compounds from Allii Macrostemonis Bulbus and Their In Vitro Antioxidant Activities
Source: MDPI journal article supplement (doi:10.3390/molecules28176176), 2023-08-22
Supplement: s1 [file s1]

## Two New Compounds from *Allii Macrostemonis Bulbus* and Their In Vitro Antioxidant Activities

Jianfa Wu <sup>1,†</sup>, Lei Li <sup>1,†</sup>, Chang Liu <sup>1</sup>, Chunyi Li <sup>1</sup>, Ying Cui <sup>1</sup>, Weixing Ding <sup>1</sup>, Jing Zhang <sup>1,\*</sup> and Leiling Shi <sup>2,\*</sup>

<sup>1</sup> Department of Traditional Chinese Medicine, College of Traditional Chinese Medicinal Materials, Jilin Agricultural University, Changchun 130118, China; 20210971@mails.jlau.edu.cn (J.W.); 20201629@mails.jlau.edu.cn (L.L.); 20210969@mails.jlau.edu.cn (C.L.); 20221569@mails.jlau.edu.cn (C.L.); 20210970@mails.jlau.edu.cn (Y.C.); 20221576@mails.jlau.edu.cn (W.D.)

<sup>2</sup> Xinjiang Institute of Chinese and Ethnic Medicine, Urumqi 830002, China

\* Correspondence: zhangjing4693@jlau.edu.cn (J.Z.); shileiling@sina.com (L.S.)

† These authors contributed equally to this work.

**Abstract:** Two new compounds named 4,4'-bis( $\beta$ -D-glucopyranosyloxy)biphenyl (**1**) and spirostane-25(27)-en-2 $\alpha$ ,3 $\beta$ -diol-3-O- $\beta$ -D-xylopyranosyl(1 $\rightarrow$ 3)- $\beta$ -D-glucopyranosyl(1 $\rightarrow$ 4)- $\beta$ -D-galactopyranoside (**2**) were isolated from n-butanol extraction part of 80% ethanol extract of *Allii Macrostemonis Bulbus*. Alongside these, ten known compounds (**3–12**) were also identified, including a flavonoid glycoside (**3**), seven steroids (**4–10**), a nucleoside (**11**), and a phenylpropanoid glycoside (**12**) were found. Notably, compounds **3–6** were isolated from this plant for the first time. The structures of all compounds were confirmed using high-resolution electrospray ionization mass spectrometry (HR-ESI-MS), 1D, and 2D NMR spectroscopy. Some of these compounds showed strong antioxidant activity, and compound **1** demonstrated the most potent reduction of ferric ions ( $\text{Fe}^{3+}$ ) with an  $\text{IC}_{50}$  value of  $0.59 \pm 0.18$  mg/mL. Compounds **2** and **3** exhibited the highest scavenging activity against superoxide anion radicals ( $\text{O}_2^{\cdot-}$ ) with an  $\text{IC}_{50}$  value of  $0.02 \pm 0.01$  mg/mL. Additionally, compound **3** displayed substantial scavenging activity against 2,2-diphenyl-1-picrylhydrazyl (DPPH) and 2,2'-azino-bis(3-ethylbenzothiazoline-6-sulfonic acid) (ABTS) with  $\text{IC}_{50}$  values of  $0.21 \pm 0.17$  mg/mL and  $0.02 \pm 0.01$  mg/mL, respectively. The discovery of these two new compounds is a reference for identifying *Allii Macrostemonis Bulbus* quality markers. Moreover, their exceptional antioxidant activity offers a promising avenue for uncovering novel natural antioxidants.

**Keywords:** *Allii Macrostemonis Bulbus*; biphenyl glycoside; steroidal saponin; antioxidant

## CONTENTS

|                                                                                                          |           |
|----------------------------------------------------------------------------------------------------------|-----------|
| <b>Table S1.</b> The assignment of carbon signals of compound <b>3-12</b>                                | <b>3</b>  |
| <b>Figure S1.</b> HR-ESI-MS spectrum of compound <b>1</b>                                                | <b>6</b>  |
| <b>Figure S2.</b> $^1\text{H}$ -NMR spectrum of compound <b>1</b> (in Methanol- $d_4$ , 600 MHz)         | <b>6</b>  |
| <b>Figure S3.</b> $^{13}\text{C}$ -NMR-APT spectrum of compound <b>1</b> (in Methanol- $d_4$ , 150 MHz)  | <b>7</b>  |
| <b>Figure S4.</b> HMQC spectrum of compound <b>1</b>                                                     | <b>7</b>  |
| <b>Figure S5.</b> HMBC spectrum of compound <b>1</b>                                                     | <b>8</b>  |
| <b>Figure S6.</b> COSY spectrum of compound <b>1</b>                                                     | <b>8</b>  |
| <b>Figure S7.</b> NOESY spectrum of compound <b>1</b>                                                    | <b>9</b>  |
| <b>Figure S8.</b> HR-ESI-MS spectrum of compound <b>2</b>                                                | <b>9</b>  |
| <b>Figure S9.</b> $^1\text{H}$ -NMR spectrum of compound <b>2</b> (in Pyridine- $d_5$ , 600 MHz)         | <b>10</b> |
| <b>Figure S10.</b> $^{13}\text{C}$ -NMR-APT spectrum of compound <b>2</b> (in Pyridine- $d_5$ , 150 MHz) | <b>10</b> |
| <b>Figure S11.</b> HMQC spectrum of compound <b>2</b>                                                    | <b>11</b> |
| <b>Figure S12.</b> HMBC spectrum of compound <b>2</b>                                                    | <b>11</b> |
| <b>Figure S13.</b> COSY spectrum of compound <b>2</b>                                                    | <b>12</b> |
| <b>Figure S14.</b> NOESY spectrum of compound <b>2</b>                                                   | <b>12</b> |

**Table S1.** The assignment of carbon signals of compound **3-12**

| Position | $\delta_c(\text{ppm})$ |                      |                      |                      |                      |                      |                      |                       |                       |                            |
|----------|------------------------|----------------------|----------------------|----------------------|----------------------|----------------------|----------------------|-----------------------|-----------------------|----------------------------|
|          | <b>3<sup>a</sup></b>   | <b>4<sup>b</sup></b> | <b>5<sup>b</sup></b> | <b>6<sup>c</sup></b> | <b>7<sup>b</sup></b> | <b>8<sup>b</sup></b> | <b>9<sup>d</sup></b> | <b>10<sup>d</sup></b> | <b>11<sup>b</sup></b> | <b>12<sup>c</sup></b>      |
| 1        | -                      | 37.61                | 37.41                | 36.54                | 36.54                | 37.95                | 37.37                | 37.37                 | -                     | 133.78                     |
| 2        | 158.54                 | 30.35                | 30.15                | 29.04                | 29.05                | 30.73                | 31.77                | 31.78                 | 153.77                | 152.74                     |
| 3        | 136.22                 | 78.33                | 78.13                | 76.35                | 75.94                | 79.11                | 71.94                | 71.95                 | -                     | 104.42                     |
| 4        | 179.65                 | 35.24                | 35.04                | 34.01                | 34.02                | 39.81                | 42.33                | 42.44                 | 150.43                | 132.62                     |
| 5        | 163.24                 | 45.04                | 44.85                | 44.04                | 44.04                | 141.36               | 140.87               | 140.87                | 121.96                | 104.42                     |
| 6        | 99.81                  | 29.35                | 29.16                | 28.32                | 28.32                | 122.43               | 121.86               | 121.88                | 158.19                | 152.74                     |
| 7        | 165.95                 | 32.83                | 32.63                | 31.89                | 31.89                | 32.65                | 31.77                | 34.04                 | -                     | 128.46                     |
| 8        | 94.70                  | 35.66                | 35.46                | 34.66                | 34.66                | 32.51                | 32.02                | 32.01                 | 141.04                | 130.21                     |
| 9        | 159.32                 | 54.78                | 54.59                | 53.68                | 53.68                | 50.79                | 50.25                | 50.23                 | 91.29(Rib-C-1')       | 61.50                      |
| 10       | 105.87                 | 36.24                | 36.04                | 35.33                | 35.33                | 37.40                | 36.64                | 36.63                 | 76.02(C-2')           | 102.53(Glc-C-1')           |
| 11       | 122.84(C-1')           | 21.70                | 21.50                | 20.60                | 20.60                | 21.76                | 21.19                | 19.98                 | 72.89(C-3')           | 74.19(C-2')                |
| 12       | 116.89(C-2')           | 40.56                | 40.37                | 40.02                | 39.44                | 40.41                | 39.79                | 39.88                 | 88.28(C-4')           | 77.27(C-3')                |
| 13       | 146.44(C-3')           | 41.21                | 41.01                | 40.12                | 40.12                | 42.95                | 42.42                | 42.42                 | 63.50(C-5')           | 69.93(C-4')                |
| 14       | 149.82(C-4')           | 56.85                | 56.66                | 55.63                | 55.63                | 57.28                | 56.04                | 56.15                 |                       | 76.57(C-5')                |
| 15       | 116.36(C-5')           | 32.58                | 32.38                | 31.43                | 31.42                | 24.99                | 24.50                | 23.17                 |                       | 60.89(C-6')                |
| 16       | 122.94(C-6')           | 81.59                | 81.39                | 79.33                | 79.41                | 29.04                | 29.08                | 26.12                 |                       | 56.36(OCH <sub>3</sub> ×2) |
| 17       | 103.55(Man-C-1'')      | 63.45                | 63.25                | 61.90                | 61.90                | 56.69                | 56.98                | 56.88                 |                       |                            |
| 18       | 72.04(C-2'')           | 17.08                | 16.88                | 16.25                | 16.25                | 12.45                | 12.18                | 12.12                 |                       |                            |
| 19       | 72.08(C-3'')           | 12.74                | 12.55                | 12.12                | 12.12                | 19.91                | 19.11                | 19.55                 |                       |                            |
| 20       | 73.22(C-4'')           | 42.42                | 42.23                | 40.05                | 41.12                | 36.88                | 40.67                | 36.28                 |                       |                            |
| 21       | 71.90(C-5'')           | 15.52                | 15.32                | 14.70                | 14.70                | 19.49                | 21.26                | 18.91                 |                       |                            |
| 22       | 17.66(C-6'')           | 109.69               | 109.49               | 108.42               | 108.42               | 34.66                | 138.48               | 28.39                 |                       |                            |
| 23       |                        | 32.25                | 32.05                | 30.91                | 30.91                | 26.79                | 129.37               | 24.44                 |                       |                            |
| 24       |                        | 29.71                | 29.52                | 28.50                | 28.50                | 46.49                | 51.37                | 45.93                 |                       |                            |
| 25       |                        | 31.06                | 30.86                | 29.84                | 29.84                | 29.89                | 32.02                | 29.22                 |                       |                            |
| 26       |                        | 67.30                | 67.11                | 67.57                | 65.92                | 19.67                | 21.36                | 19.55                 |                       |                            |

|       |        |        |        |        |        |       |       |
|-------|--------|--------|--------|--------|--------|-------|-------|
| 27    | 17.80  | 17.61  | 17.14  | 17.14  | 20.48  | 19.55 | 19.15 |
| 28    | -      |        | -      | -      | 23.85  | 25.56 | 21.21 |
| 29    | -      |        | -      | -      | 12.64  | 12.42 | 12.00 |
| Gla-1 | 102.83 | 102.63 | 100.90 | 100.90 | -      |       |       |
| 2     | 75.76  | 75.80  | 73.82  | 71.52  | -      |       |       |
| 3     | 75.99  | 75.84  | 75.89  | 73.80  | -      |       |       |
| 4     | 81.97  | 81.36  | 80.21  | 79.28  | -      |       |       |
| 5     | 77.73  | 76.47  | 74.91  | 74.30  | -      |       |       |
| 6     | 61.05  | 60.85  | 68.93  | 59.47  | -      |       |       |
| Glc-1 | 105.02 | 104.83 | 102.48 | 103.37 | 103.04 |       |       |
| 2     | 80.76  | 81.77  | 74.29  | 80.20  | 75.84  |       |       |
| 3     | 88.93  | 88.74  | 77.03  | 86.90  | 79.03  |       |       |
| 4     | 71.29  | 71.82  | 69.96  | 69.62  | 72.14  |       |       |
| 5     | 79.13  | 80.57  | 76.83  | 76.06  | 78.53  |       |       |
| 6     | 62.71  | 62.51  | 63.27  | 60.81  | 63.29  |       |       |
| Glc-1 | 105.41 | 105.21 | -      | 102.95 |        |       |       |
| 2     | 76.04  | 77.54  | -      | 73.54  |        |       |       |
| 3     | 80.72  | 80.52  | -      | 76.36  |        |       |       |
| 4     | 73.68  | 73.48  | -      | 69.15  |        |       |       |
| 5     | 78.03  | 78.93  | -      | 75.87  |        |       |       |
| 6     | 63.51  | 63.32  | -      | 60.97  |        |       |       |
| Glc-1 | -      | -      | -      | 102.50 |        |       |       |
| 2     | -      | -      | -      | 73.68  |        |       |       |
| 3     | -      | -      | -      | 76.99  |        |       |       |
| 4     | -      | -      | -      | 70.11  |        |       |       |
| 5     | -      | -      | -      | 76.52  |        |       |       |
| 6     | -      | -      | -      | 61.41  |        |       |       |
| Xyl-1 | 105.60 | 105.40 | -      |        |        |       |       |
| 2     | 76.67  | 77.83  | -      |        |        |       |       |
| 3     | 79.17  | 78.98  | -      |        |        |       |       |

|       |       |       |        |
|-------|-------|-------|--------|
| 4     | 72.02 | 75.57 | -      |
| 5     | 67.30 | 67.11 | -      |
| Ara-1 |       |       | 103.33 |
| 2     |       |       | 71.48  |
| 3     |       |       | 73.54  |
| 4     |       |       | 69.61  |
| 5     |       |       | 65.91  |

<sup>1</sup>H-NMR and <sup>13</sup>C-NMR were measured at 150 MHz and 600 MHz, respectively, using deuterated <sup>a)</sup> Methanol-d<sub>4</sub>, <sup>b)</sup> Pyridine-d<sub>5</sub>, <sup>c)</sup> DMSO-d<sub>6</sub>, <sup>d)</sup> Chloroform-d as the deuterated solvent.

WJF-2-4-H\_230717145944 #1 RT: 0.00 AV: 1 NL: 1.28E7  
T: FTMS + p ESI Full ms [200.00-2000.00]

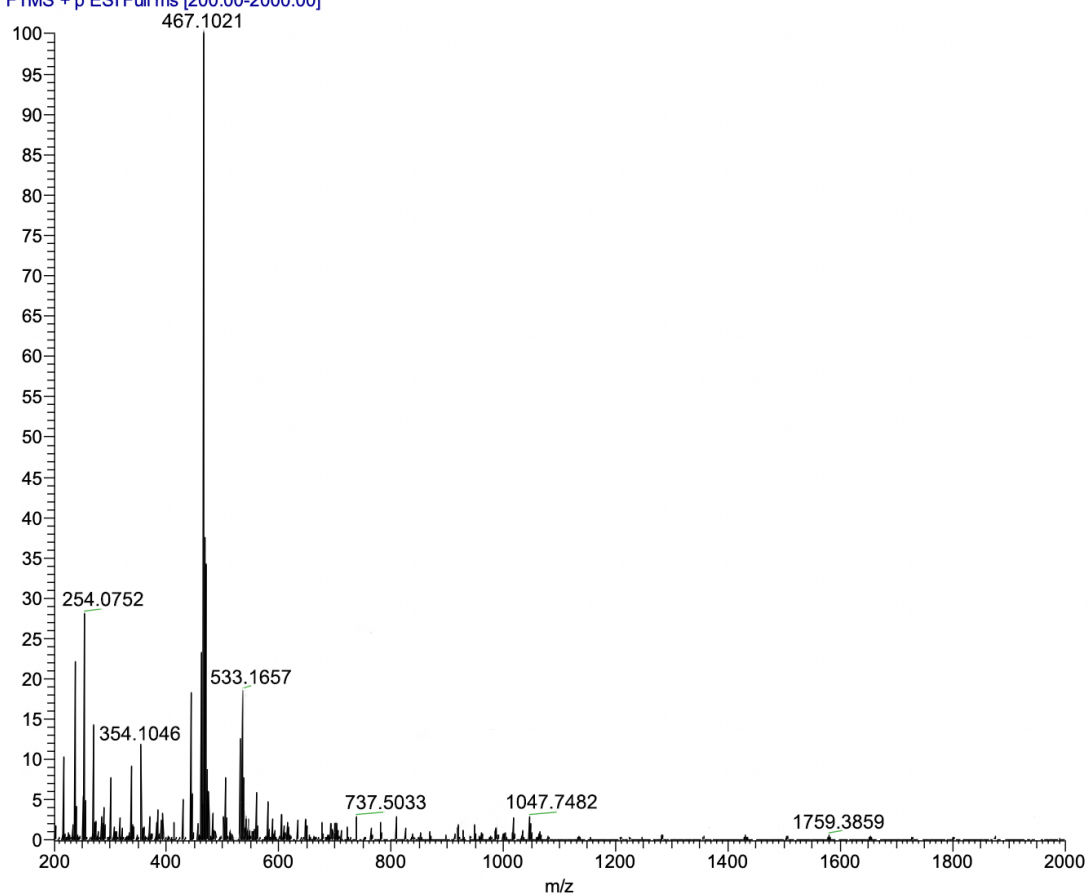

Figure S1. HR-ESI-MS spectrum of compound 1

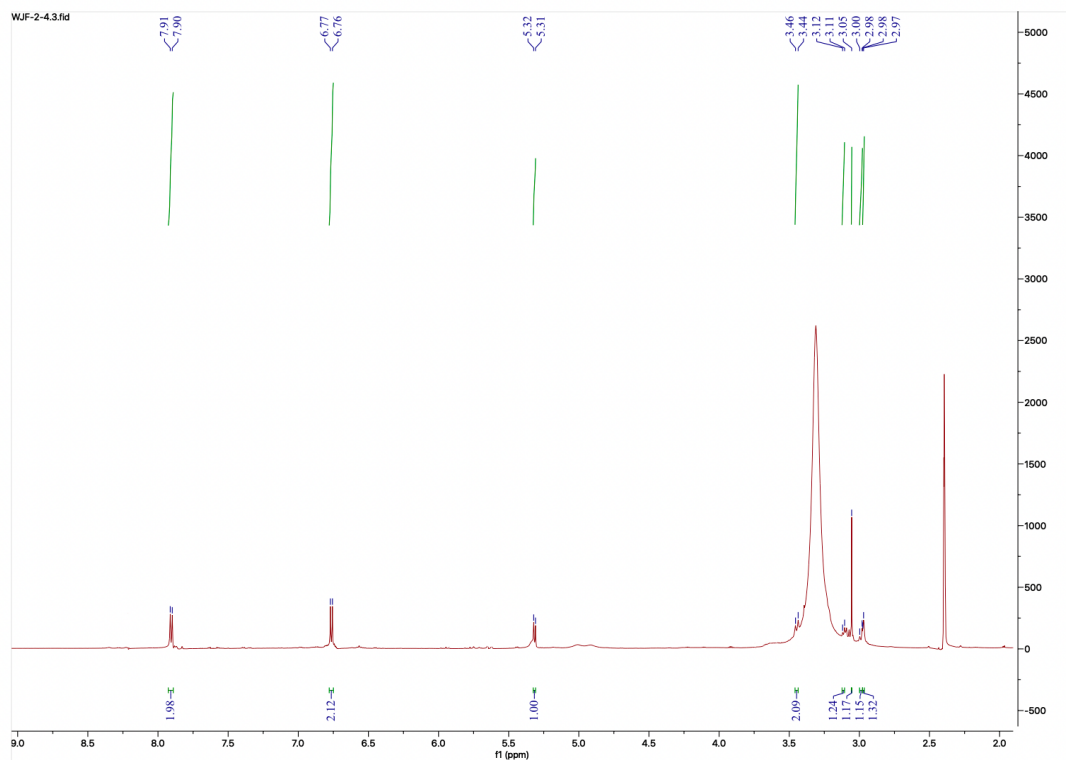

Figure S2. <sup>1</sup>H-NMR spectrum of compound 1 (in Methanol-*d*<sub>4</sub>, 600 MHz)

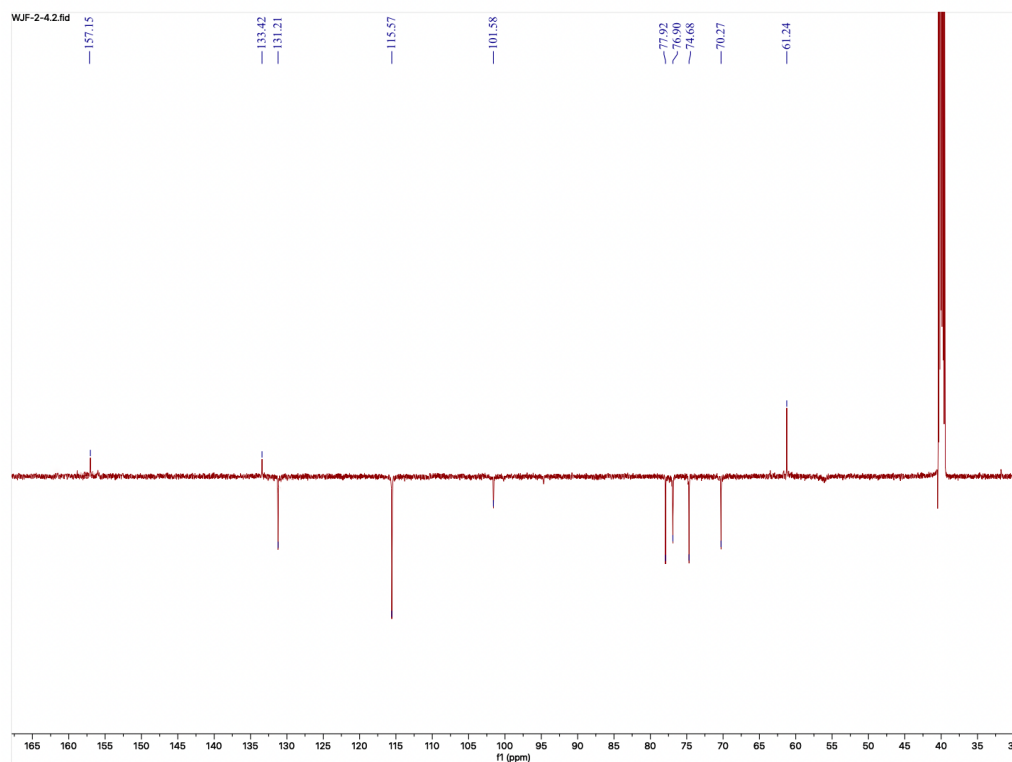

**Figure S3.**  $^{13}\text{C}$ -NMR-APT spectrum of compound **1** (in Methanol- $d_4$ , 150 MHz)

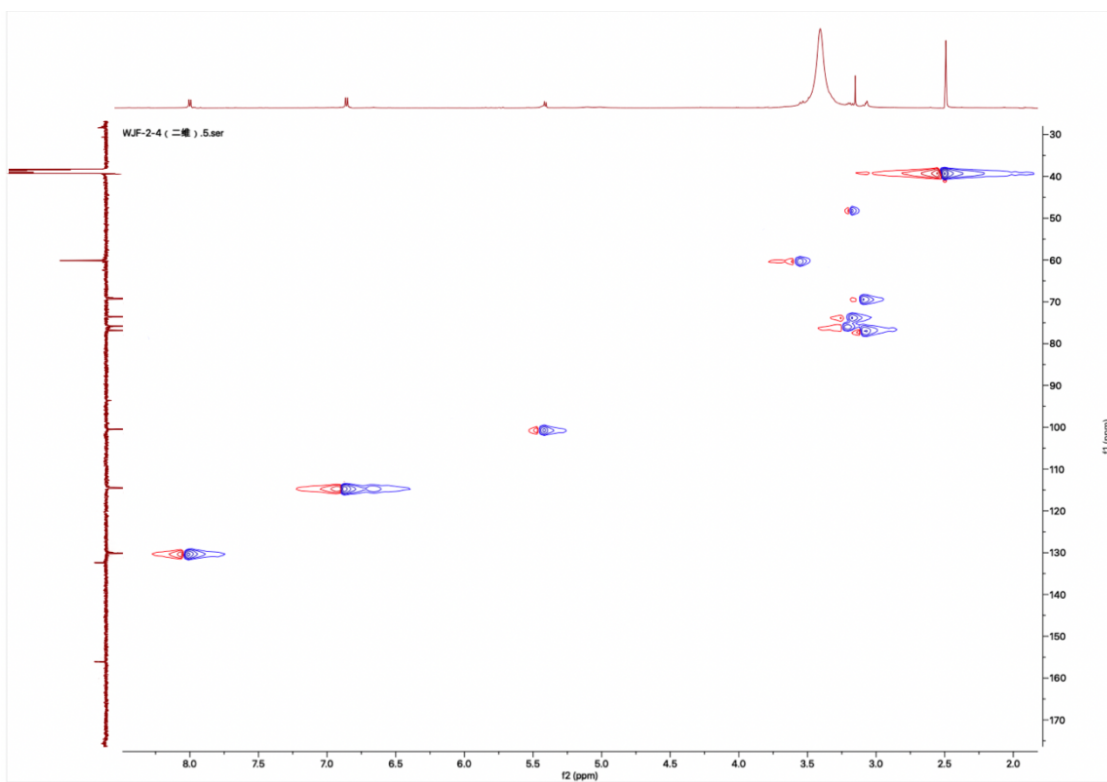

**Figure S4.** HMQC spectrum of compound **1**

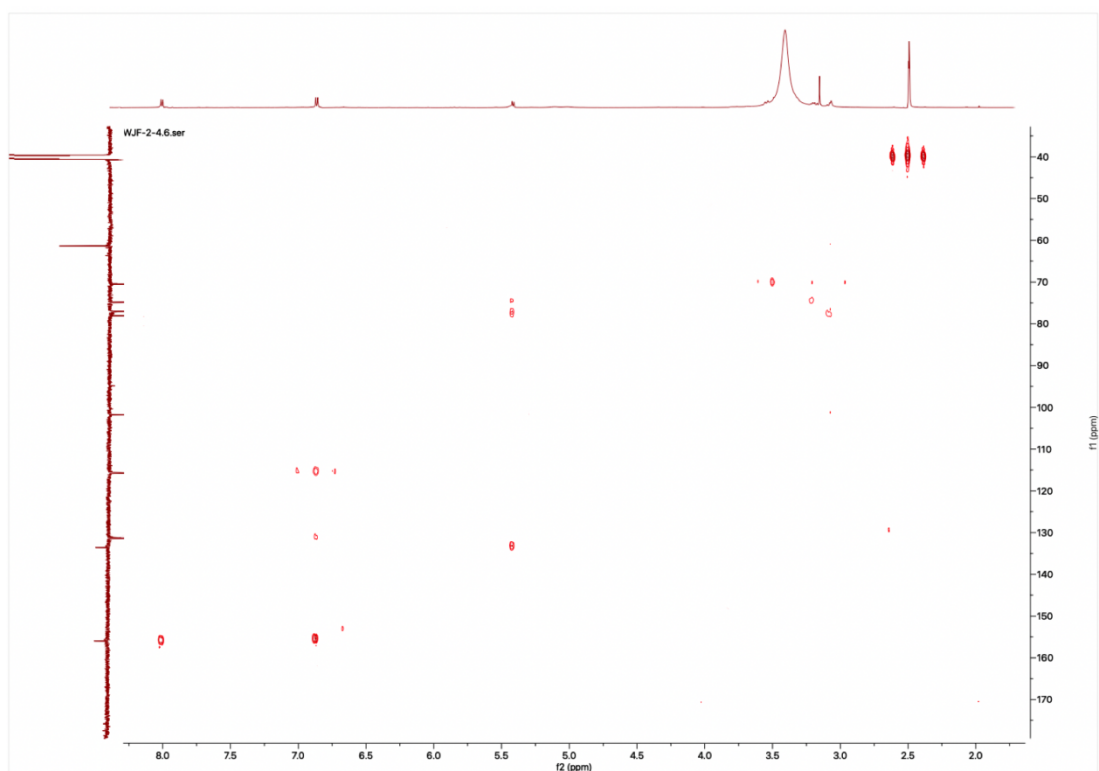

**Figure S5.** HMBC spectrum of compound **1**

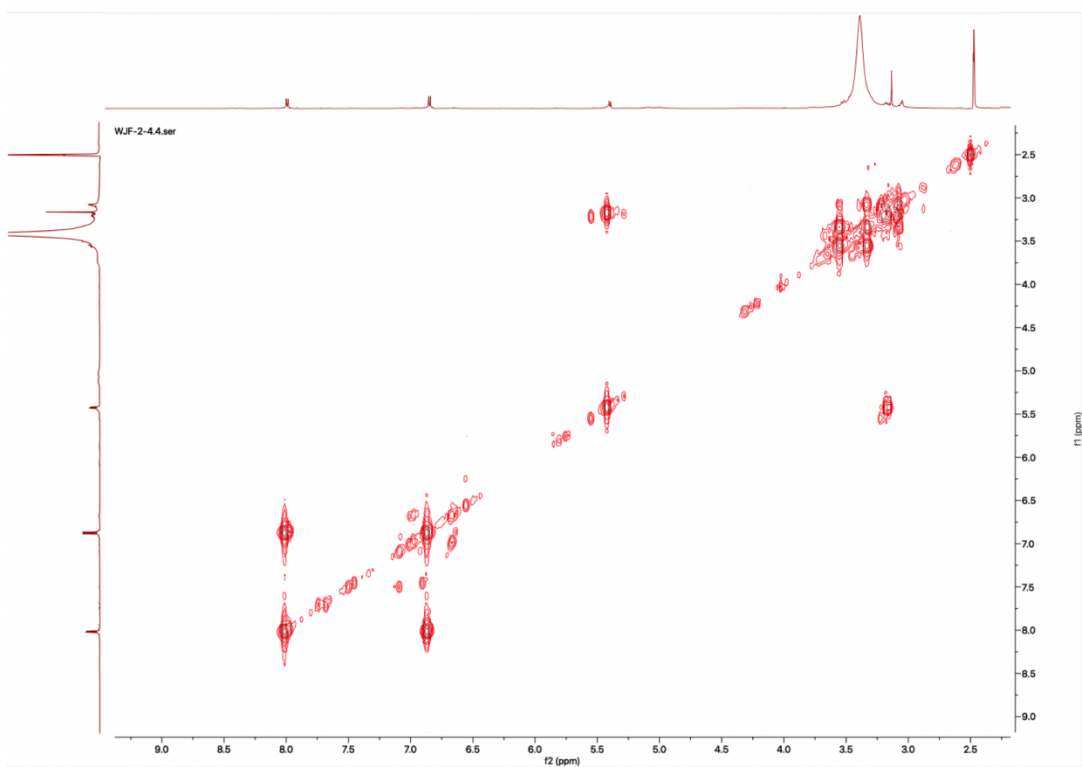

**Figure S6.** COSY spectrum of compound **1**



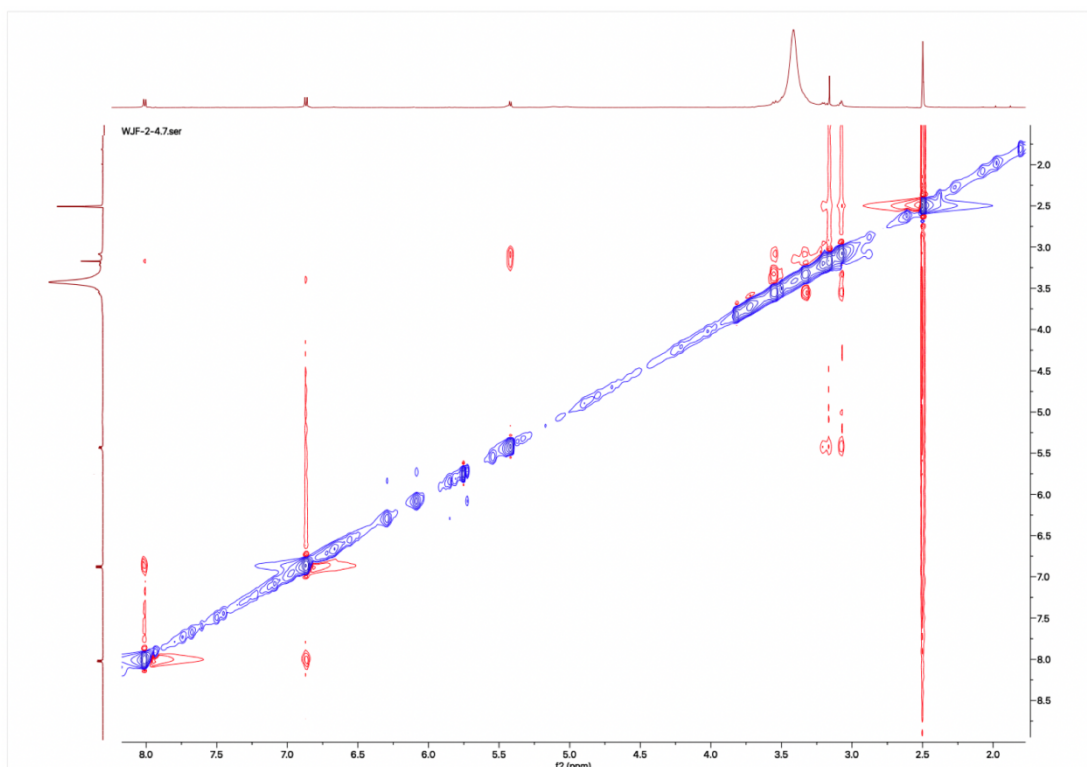

**Figure S7.** NOESY spectrum of compound **1**

WJF-2-23-H\_230717145944 #1 RT: 0.00 AV: 1 NL: 1.23E7  
T: FTMS + p ESI Full ms [200.00-2000.00]

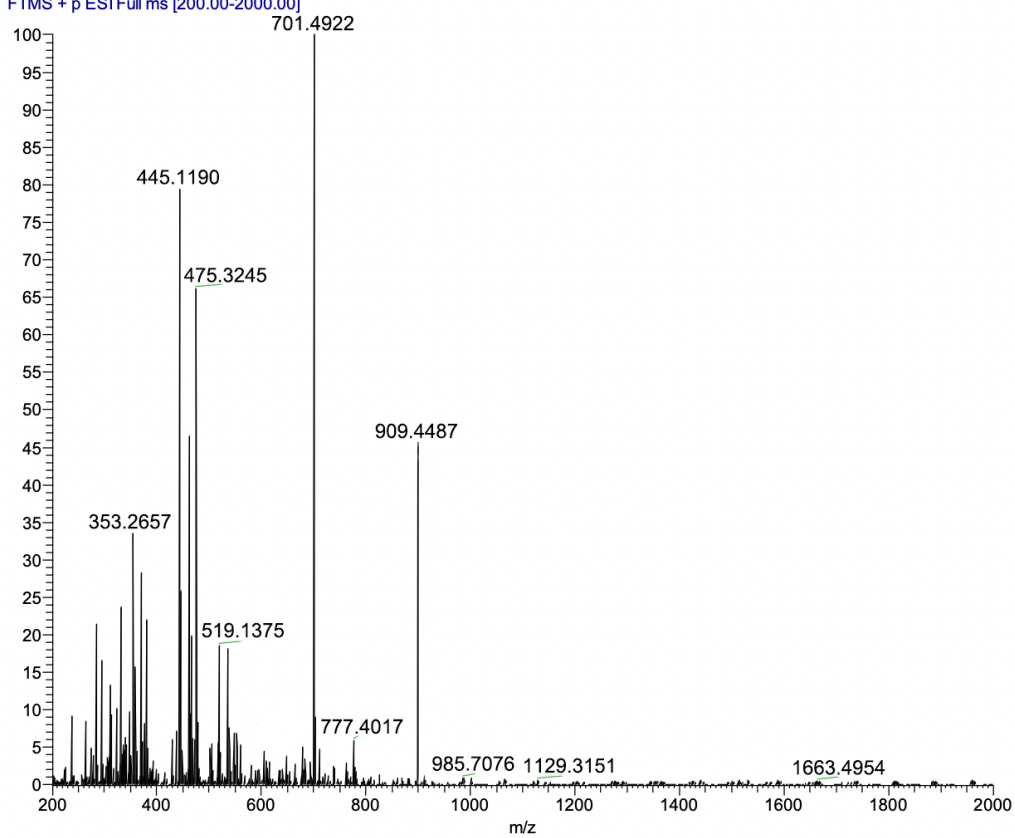

**Figure S8.** HR-ESI-MS spectrum of compound **2**

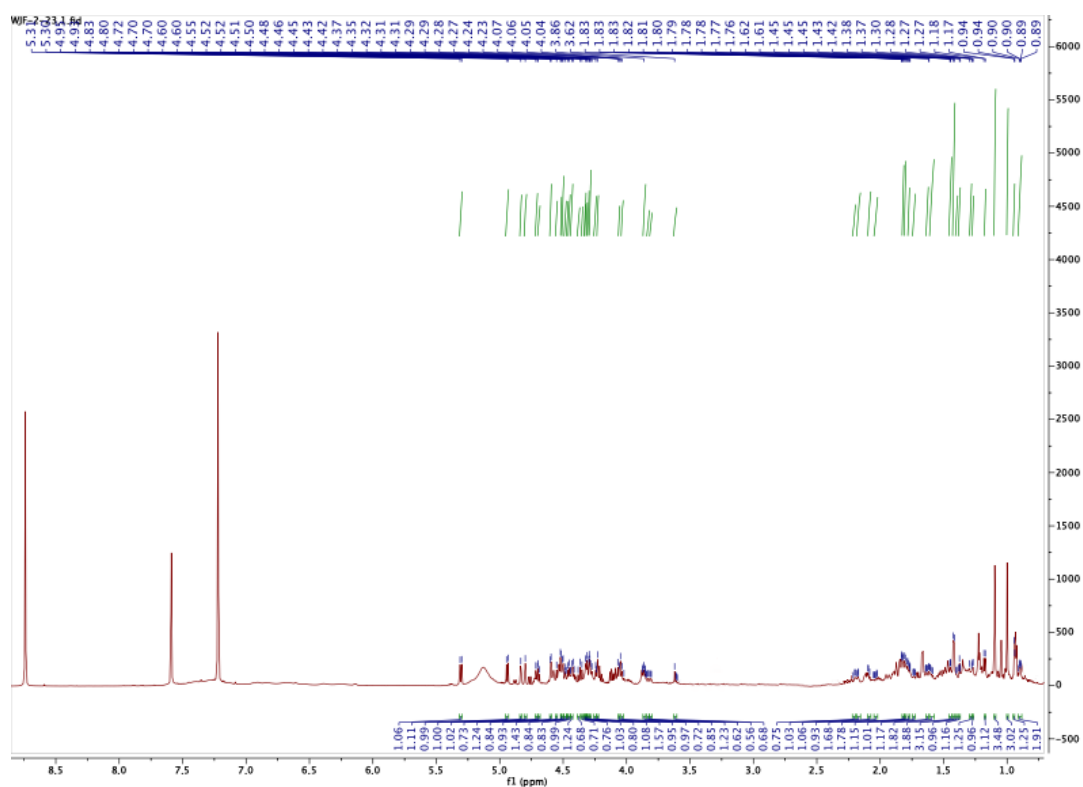

Figure S9.  $^1\text{H}$ -NMR spectrum of compound **2** (in Pyridine- $d_5$ , 600 MHz)

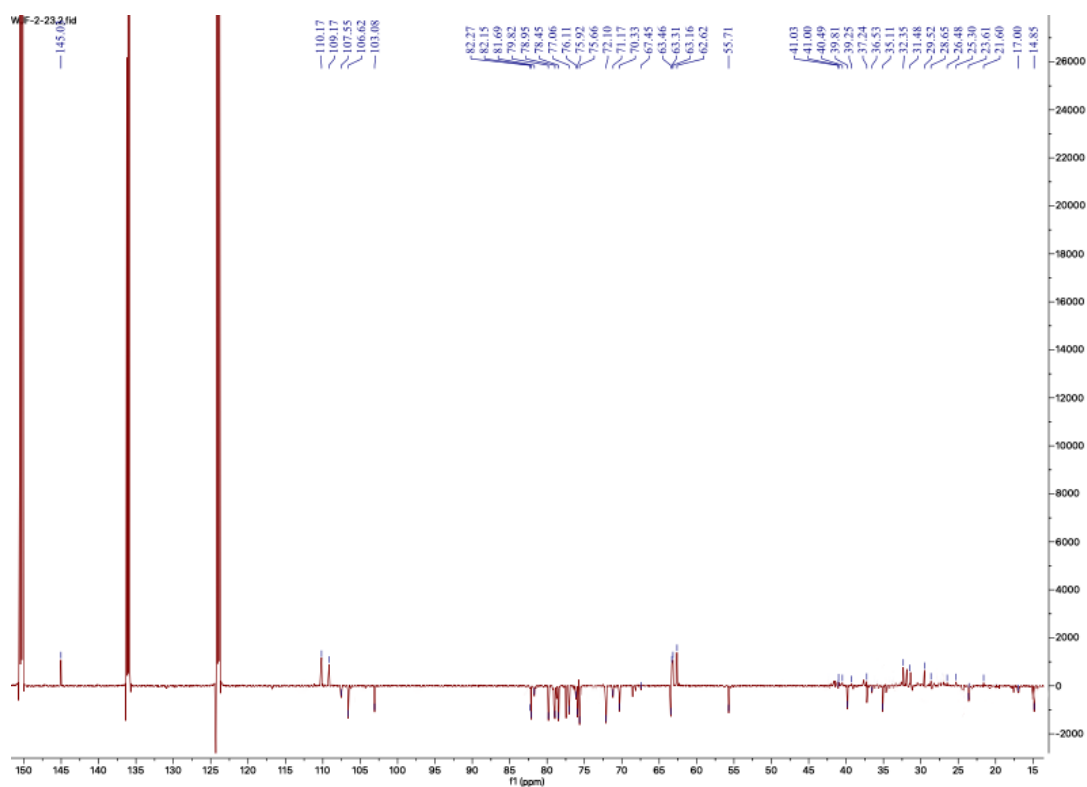

Figure S10.  $^{13}\text{C}$ -NMR-APT spectrum of compound **2** (in Pyridine- $d_5$ , 150 MHz)

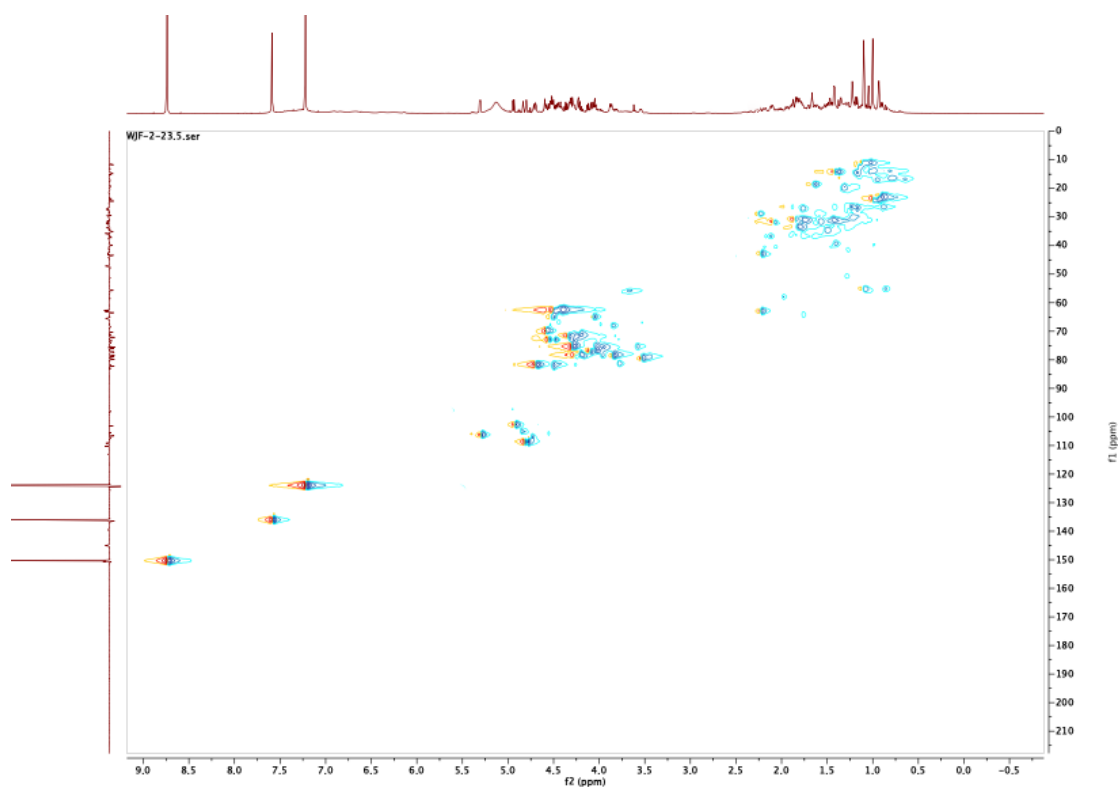

Figure S11. HMQC spectrum of compound 2

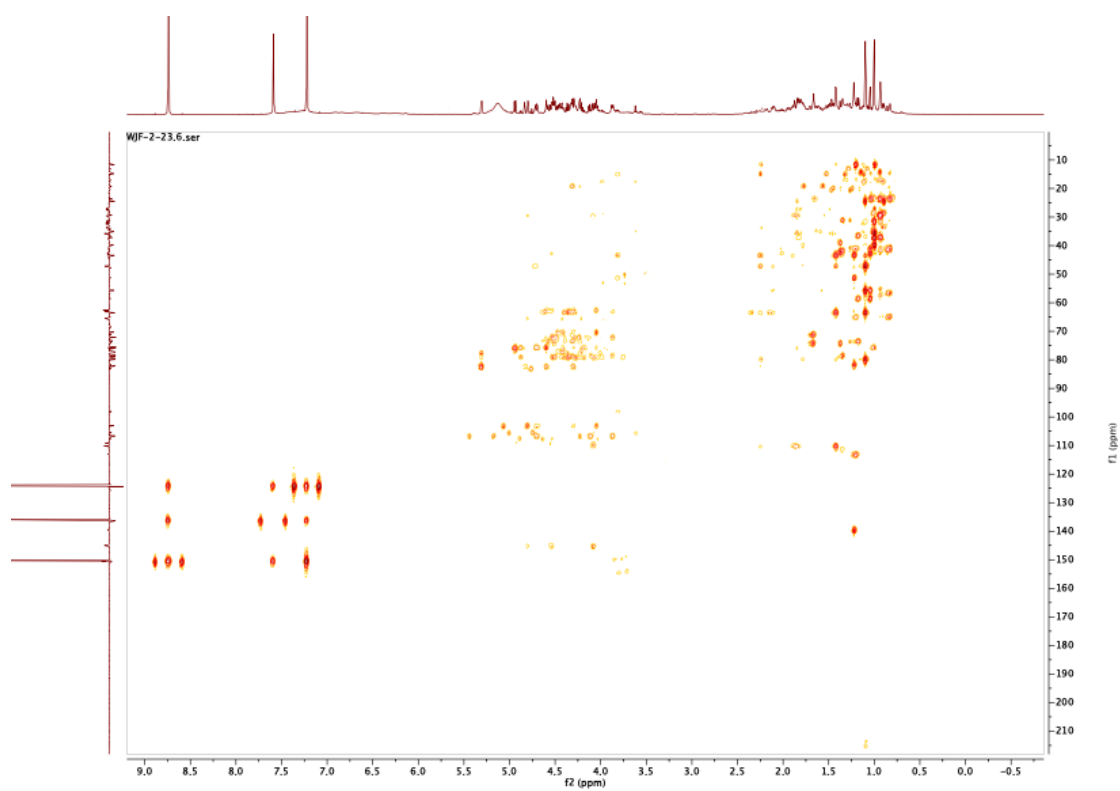

Figure S12. HMBC spectrum of compound 2

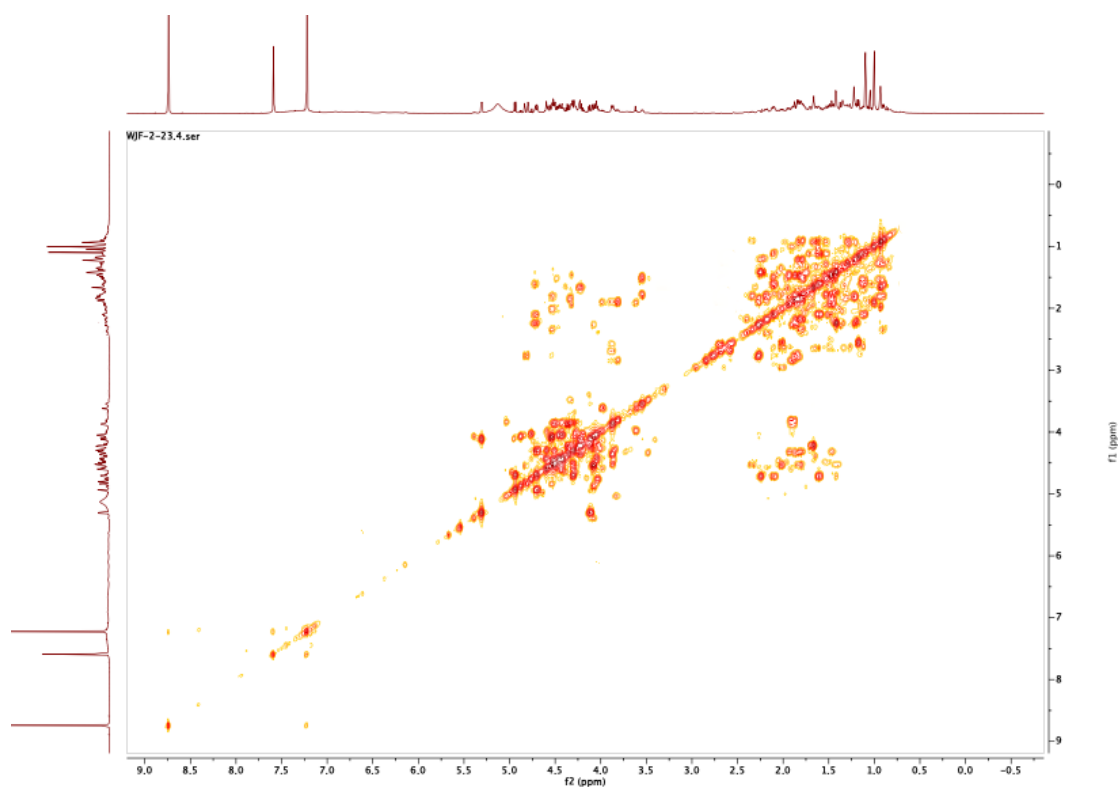

Figure S13. COSY spectrum of compound 2

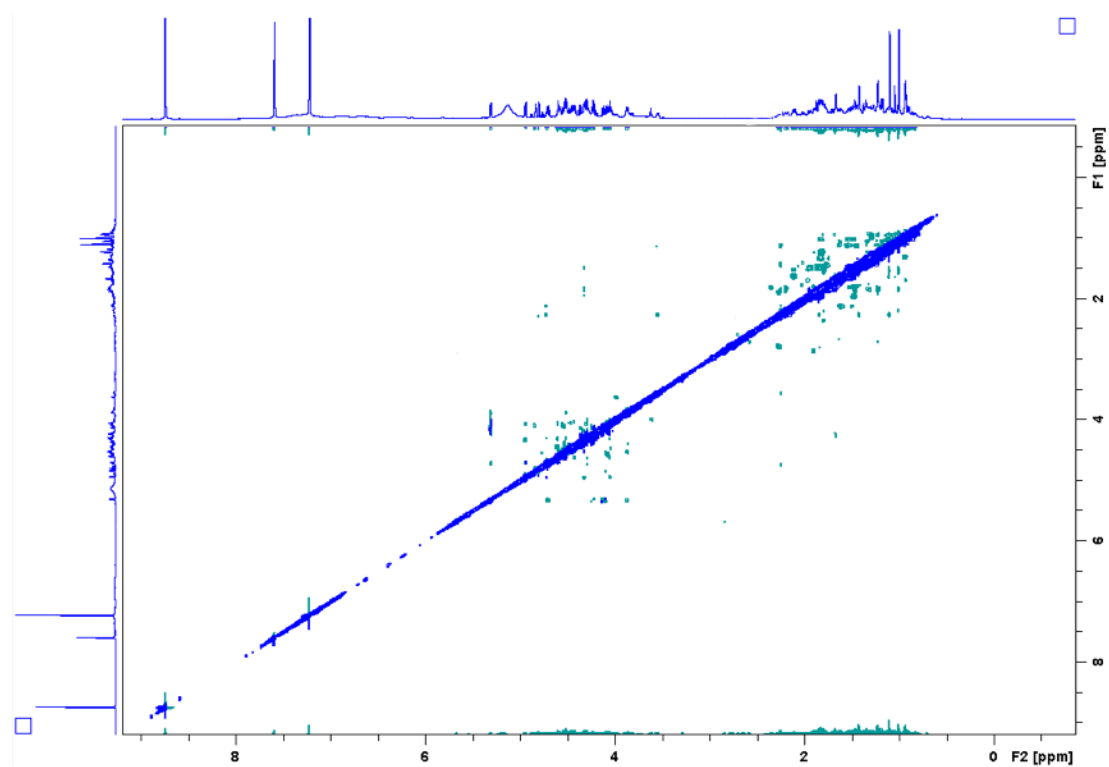

Figure S14. NOESY spectrum of compound 2
